# Supplementary material for: Microbiome Search Engine 2: a Platform for Taxonomic and Functional Search of Global Microbiomes on the Whole-Microbiome Level
Source: PubMed Central journal article supplement (PMC7820668; doi:10.1128/msystems.00943-20), 2021-01-19
Supplement: mSystems.00943-20-sf001.pdf [file mSystems.00943-20-sf001.pdf]

## Supplementary figure

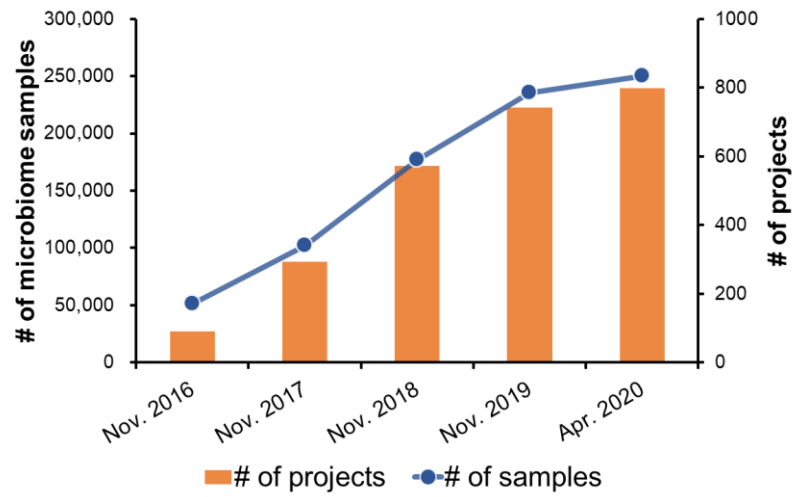

**Fig. S1. MSE 2 microbiome database is regularly maintained and updated since 2016.**
