# Supplementary material for: Microbiome Search Engine 2: a Platform for Taxonomic and Functional Search of Global Microbiomes on the Whole-Microbiome Level
Source: PubMed Central journal article supplement (PMC7820668; doi:10.1128/msystems.00943-20), 2021-01-19
Supplement: mSystems.00943-20-st001.pdf [file mSystems.00943-20-st001.pdf]

## Supplementary table

**Table S1. Unified metadata categories and sample numbers of MSE 2 microbiome database.**

| <b>Habitat domain</b> | <b>Habitat type</b> | <b># of samples</b> | <b>Rate</b> |
|-----------------------|---------------------|---------------------|-------------|
| Human associated      | Gut                 | 85,615              | 34.21%      |
| Human associated      | Skin                | 22,714              | 9.08%       |
| Human associated      | Oral                | 16,039              | 6.41%       |
| Human associated      | Other body site     | 4,951               | 1.98%       |
| Human associated      | Urogenital          | 2,293               | 0.92%       |
| Human associated      | Nose                | 596                 | 0.24%       |
| Animal associated     | Mammal animal       | 42,380              | 16.93%      |
| Animal associated     | Non-mammal animal   | 16,839              | 6.73%       |
| Environment           | Soil                | 15,998              | 6.39%       |
| Environment           | Building            | 14,375              | 5.74%       |
| Environment           | Marine              | 6,718               | 2.68%       |
| Environment           | Lake                | 4,242               | 1.69%       |
| Environment           | Other environment   | 4,131               | 1.65%       |
| Environment           | Plant               | 3,697               | 1.48%       |
| Environment           | Freshwater          | 3,486               | 1.39%       |
| Environment           | River               | 2,251               | 0.90%       |
| Environment           | Milk                | 1,636               | 0.65%       |
| Environment           | Food                | 1,344               | 0.54%       |
| Environment           | Sand                | 968                 | 0.39%       |
